# Supplementary material for: Improving electromagnetic engineering of thermal conductive composites by establishing continuous thermal conductive networks with gradient impedance
Source: Royal Society of Chemistry journal article supplement (doi:10.1039/d4tc03974b), 2024-10-31
Supplement: d4tc03974b1.pdf [file d4tc03974b1.pdf]

**Improving electromagnetic engineering of thermal conductive composites by  
establishing continuous thermal conductive networks with gradient impedance**

Dong An <sup>1,2</sup>, Hongfeng Chen<sup>2</sup>, Huitao Yu<sup>1</sup>, Jiaqi Chen<sup>1</sup>, Junru Yao<sup>2\*</sup>, Chingping Wong<sup>3</sup>, Wei

Feng<sup>1\*</sup>

1. Tianjin Key Laboratory of Composite and Functional Materials, School of Materials Science and Engineering, Tianjin University, Tianjin, 300072, China.

2. Shanxi Key Laboratory of Nano-functional Composite Materials, School of Materials Science and Engineering, North University of China, Taiyuan 030051, China.

3. School of Materials Science and Engineering, Georgia Institute of Technology, Atlanta, Georgia, 30332, USA.

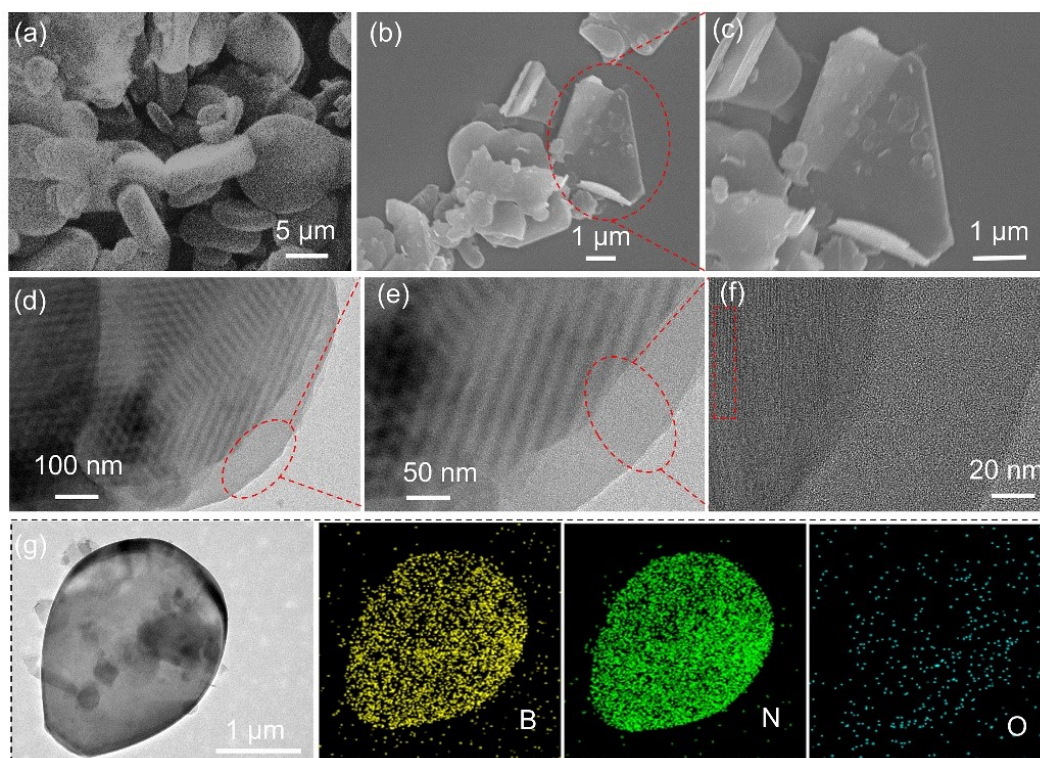

Fig. S1. SEM images of a) h-BN, b-c) few-layer BNNS. d-f) TEM images of few-layer BNNS and g) few-layer BNNS element mapping.

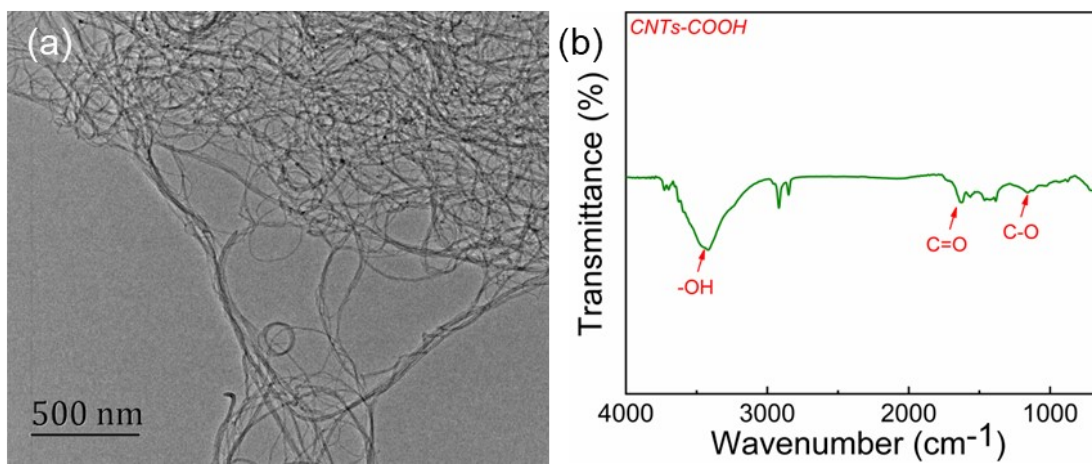

Fig. S2. (a) TEM images of CNTs-COOH, (b) FT-IR spectrum of CNTs-COOH.

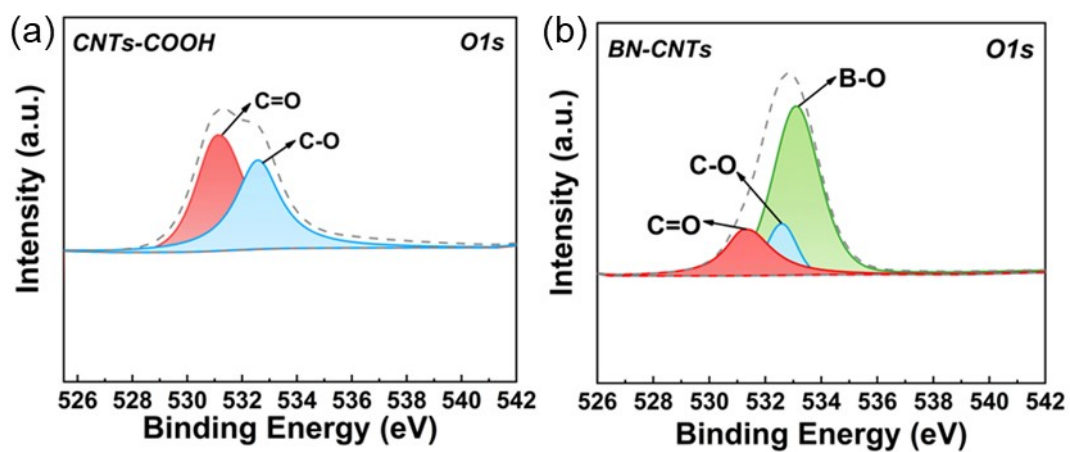

Fig. S3. XPS spectra of O1s for CNTs-COOH and BN-CNTs hybrids, respectively.

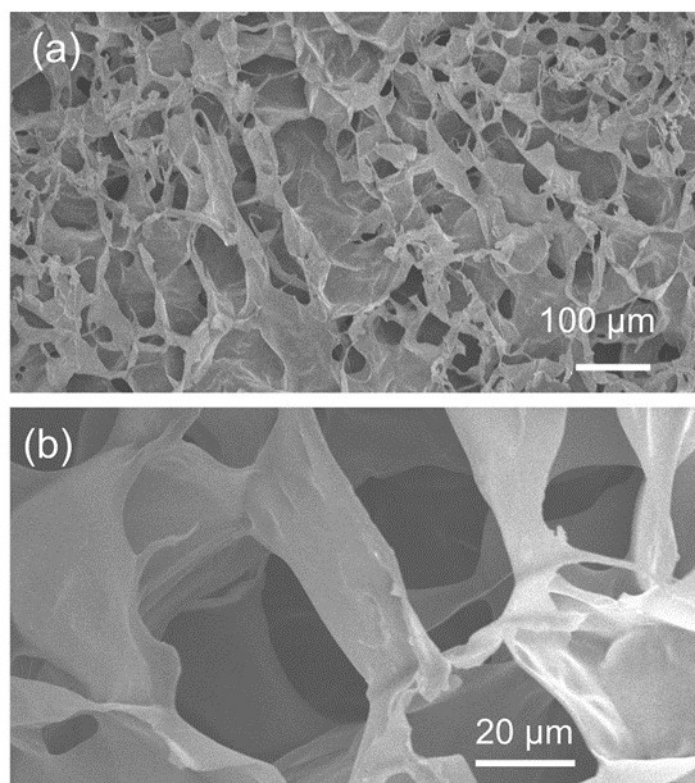

Figure S4. SEM images of CMC aerogel.

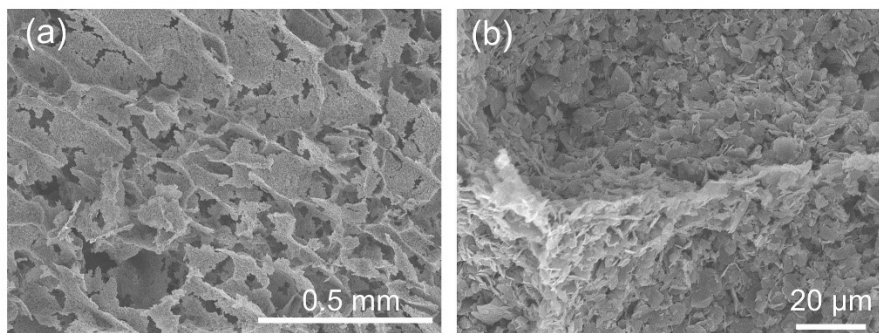

Figure S5. SEM images of CMC/BN aerogel.

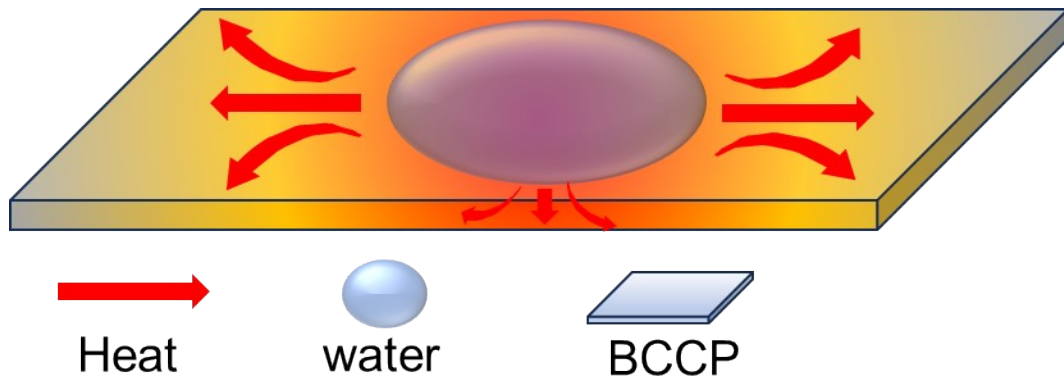

Figure S6. the diagram of heat dissipation of the water with composites.

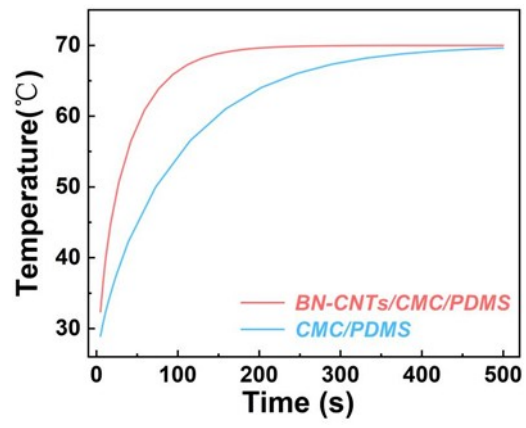

Figure S7. the change of surface temperature with the heating time.



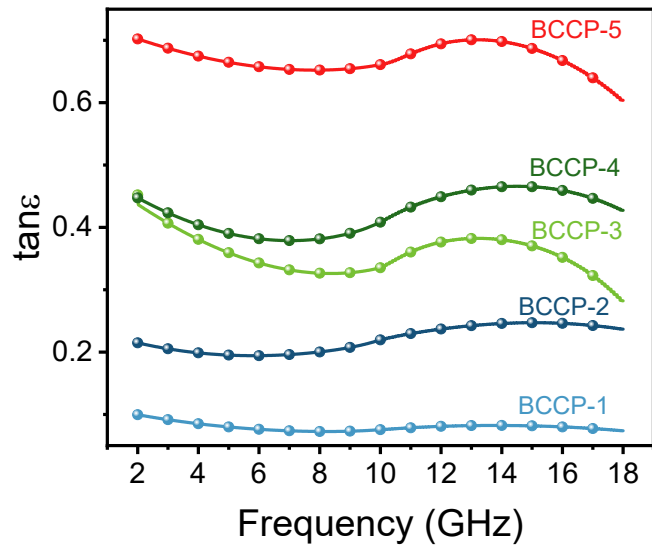

Figure S8.  $\tan \epsilon$  of BCCP composites.

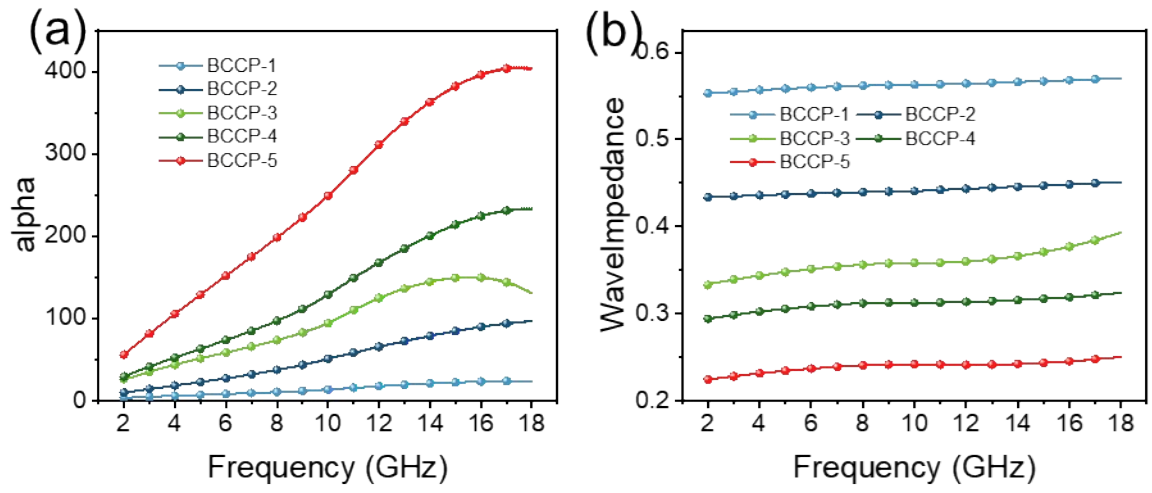

Fig. S9. Alpha and wave impedance of BCCP composites.

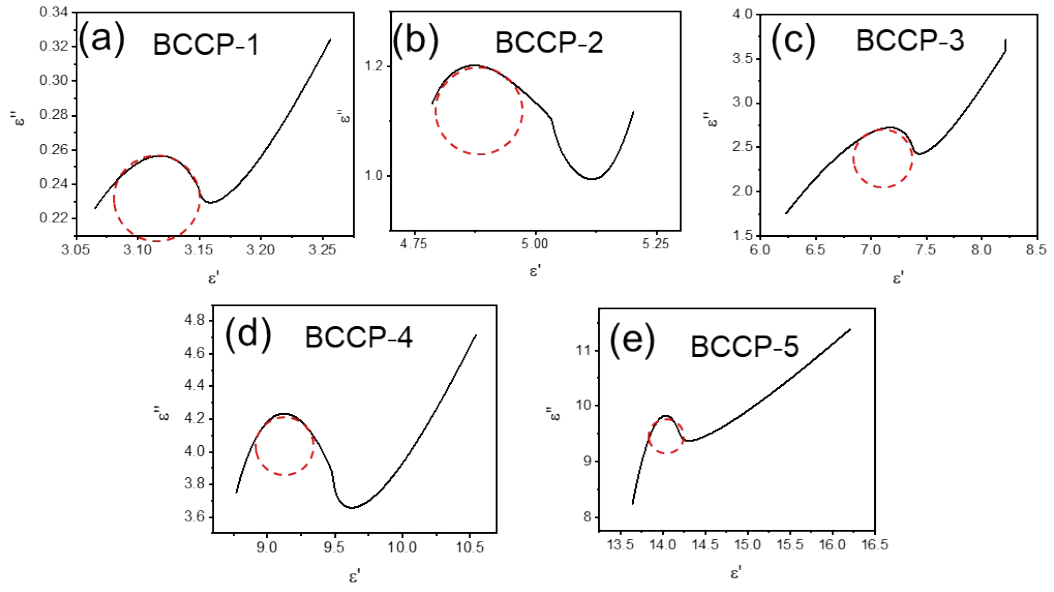

Fig. S10. Typical Cole-Cole semicircles ( $\epsilon'$  versus  $\epsilon''$ ) of BCCP composites.

Table S1. Thermal conductivity of BCCP composites.

| Sample | Thermal conductivity ( $\text{W}\cdot\text{m}^{-1}\cdot\text{K}^{-1}$ ) |
|--------|-------------------------------------------------------------------------|
| BCCP-1 | $3.56\pm 0.26$                                                          |
| BCCP-2 | $3.87\pm 0.19$                                                          |
| BCCP-3 | $4.26\pm 0.15$                                                          |
| BCCP-4 | $4.78\pm 0.22$                                                          |
| BCCP-5 | $5.07\pm 0.18$                                                          |

Table S2 Comparison of wave absorption and thermal conduction of PCBC composites with those of relevant composites reported in the literature.

| Filler                          | Matrix          | Filler proportion (%) | Thermal conductivity ( $\text{W}\cdot\text{m}^{-1}\cdot\text{K}^{-1}$ ) | $\text{RL}_{\text{min}}$ (dB) | $\text{R}_L < -10 \text{ dB}$ |           |               |
|---------------------------------|-----------------|-----------------------|-------------------------------------------------------------------------|-------------------------------|-------------------------------|-----------|---------------|
|                                 |                 |                       |                                                                         |                               | Thickness (mm)                | EAB (GHz) |               |
| CNF@C-Ni                        | Epoxy           | 5                     | 0.5                                                                     | -49.77                        | 2.2                           | 5.44      | <sup>1</sup>  |
| BN-MXene                        | PDMS            | 15                    | 2.03                                                                    | -49.37                        | 2.0                           | 5.8       | <sup>2</sup>  |
| SiC@BN                          | Epoxy           | 16.69                 | 2.21                                                                    | -21.5                         | 3.0                           | 2.8       | <sup>3</sup>  |
| BCN@LDH                         | EP              | 10                    | 0.49                                                                    | -55.75                        | 2.1                           | 6.43      | <sup>4</sup>  |
| BCN                             | Natural rubber  | 2.86                  | 0.338                                                                   | -54.24                        | 1.4                           | 4.16      | <sup>5</sup>  |
| CNF/ $\text{Fe}_x\text{O}_y$    | Wafers          | 30                    | 3.22                                                                    | -41.16                        | 3.3                           | 10.72     | <sup>6</sup>  |
| SG@SiC                          | Silicone rubber | 73.3                  | 3.28                                                                    | -31.9                         | 2                             | 2.9       | <sup>7</sup>  |
| GN/PPy/ $\text{Al}_2\text{O}_3$ | Silicone rubber | 50                    | 4.649                                                                   | -14.78                        | 2                             | 6.48      | <sup>8</sup>  |
| Ni@C                            | Natural rubber  | -                     | 0.2                                                                     | -54.8                         | 1.9                           | 7.8       | <sup>9</sup>  |
| BNNS@ $\text{Fe}_3\text{O}_4$   | -               | 100                   | 1.75                                                                    | -45.31                        | 2                             | 2.5       | <sup>10</sup> |
| Ni@GNP                          | PMMA            | 30                    | 1.29                                                                    | -30                           | 2                             | 1.4       | <sup>11</sup> |
| NPC@ $\text{MoSe}_2$            | PDMS            | 15                    | 0.97                                                                    | -51.6                         | 2.6                           | 7.1       | <sup>12</sup> |
| MDCF@BN                         | EP              | 25                    | 0.99                                                                    | -52.77                        | 3                             | 5.6       | <sup>13</sup> |
| CNT@NiO                         | natural rubber  | 5                     | 1.05                                                                    | -47.1                         | 1.5                           | 4.24      | <sup>14</sup> |
| Mxene/Co                        | PVDF            | 12                    | 1.36                                                                    | -45.6                         | 4                             | -         | <sup>15</sup> |
| $\text{TiO}_2$ @C-Ni/CNTs       | natural rubber  | 3                     | 0.25                                                                    | -32.3                         | 1.8                           | 5.5       | <sup>16</sup> |
| BCCP-4                          | PDMS            | 8                     | 3.56                                                                    | -63.34                        | 1.7                           | 4.81      | This work     |

## References:

1. Y. Qian, Y. Tao, W. Li, Y. Li, T. Xu, J. Hao, Q. Jiang, Y. Luo and J. Yang, *Chem. Eng. J.*, 2021, **425**.
2. D. An, Z. Li, H. Chen, C. Liang, Z. Sun, J. Li, J. Yao, Y. Liu and C. Wong, *Composites Part A: Applied Science and Manufacturing*, 2022, **156**.
3. D. Pan, G. Yang, H. M. Abo-Dief, J. Dong, F. Su, C. Liu, Y. Li, B. Bin Xu, V. Murugadoss, N. Naik, S. M. El-Bahy, Z. M. El-Bahy, M. Huang and Z. Guo, *Nanomicro Lett*, 2022, **14**, 118.
4. Y. Qian, Y. Luo, Y. Li, T. Xiong, L. Wang, W. Zhang, S. Gang, X. Li, Q. Jiang and J. Yang, *Chem. Eng. J.*, 2023, **467**.
5. P. Mou, J. Zhao, G. Wang, S. Shi, G. Wan, M. Zhou, Z. Deng, S. Teng and G. Wang, *Chem. Eng. J.*, 2022, **437**.
6. L. Xing, Y. Chen, Y. Yang, C. He, T. Wu, H. Xia, K. Shen, G. Tong and W. Wu, *Chem. Eng. J.*, 2023, **469**.
7. Y. Tian, M. Huang, N. Kong, Z. Wang, C. Ye, L. Fu, K. Jia, J. Fan, R. Tan and F. Han, *Carbon*, 2023, **214**.
8. X. Yang, K. Fu, L. Wu, X. Tang, J. Wang, G. Tong, D. Chen and W. Wu, *Carbon*, 2022, **199**, 1-12.
9. L. Ma, Z. Dou, D. Li, J. Liu, Y. Xu and G. Wang, *Carbon*, 2023, **201**, 587-598.
10. Y. Bai, R. Liu, L. Wang, C. Ge, G. Shi and X. Zhang, *J. Alloys Compd.*, 2020, **837**.
11. Y. Pan, B. Yang, N. Jia, Y. Yu, X. Xu, Y. Wang, R. Xia, J. Qian, C. Wang, A. Sun, Y. Shi and Y. Fang, *Industrial & Engineering Chemistry Research*, 2021, **60**, 12316-12327.
12. Y. Zhang, L. Zhang, B. Zhou, M. Ahmad, Q. Zhang and B. Zhang, *Carbon*, 2023, **209**.
13. Y. Qian, Y. Tao, Y. Li, J. Hao, C. Xu, W. Yan, Q. Jiang, Y. Luo and J. Yang, *Chem. Eng. J.*, 2022, **441**.
14. M. Zhou, G. Wan, P. Mou, S. Teng, S. Lin and G. Wang, *Journal of Materials Chemistry C*, 2021, **9**, 869-880.
15. R. Li, Q. Gao, H. Xing, Y. Su, H. Zhang, D. Zeng, B. Fan and B. Zhao, *Carbon*, 2021, **183**, 301-312.
16. L. Wu, X. Liu, G. Wan, X. Peng, Z. He, S. Shi and G. Wang, *Chem. Eng. J.*, 2022, **448**.
